# Supplementary material for: Valorization of Nam Wah Banana (Musa paradisiaca L.) Byproducts as a Source of Bioactive Compounds with Antioxidant and Anti-inflammatory Properties: In Vitro and In Silico Studies
Source: MDPI journal article supplement (doi:10.3390/foods12213955), 2023-10-29
Supplement: s1 [file s1]

## Supplementary Materials

# Valorization of Nam Wah Banana (*Musa paradisiaca* L.) Byproducts as a Source of Bioactive Compounds with Antioxidant and Anti-inflammatory Properties: In Vitro and In Silico Studies

**Supplementary Table S1.** List of phytochemical compounds reported in leaves of *Musa* spp.

| Compound                  | Source                                                                                                                           | Structure                                                                            | Reference |
|---------------------------|----------------------------------------------------------------------------------------------------------------------------------|--------------------------------------------------------------------------------------|-----------|
| Behenic acid              | <i>M. acuminata</i> X <i>M. balbisiana</i> (ABB group)                                                                           | 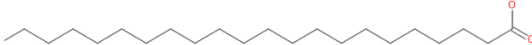   | [1]       |
| Eicosapentaenoic acid     | <i>M. acuminata</i> X <i>M. balbisiana</i> (ABB group)                                                                           |   | [1]       |
| Kaempferol-3-O-rutinoside | <i>M. balbisiana</i>                                                                                                             |   | [2]       |
| Lignoceric acid           | <i>M. acuminata</i> X <i>M. balbisiana</i> (ABB group)                                                                           |  | [1]       |
| Linoleic acid             | <i>M. acuminata</i> X <i>M. balbisiana</i> (ABB group), <i>Musa liukuensis</i> , <i>M. acuminata</i> , and <i>M. chiliocarpa</i> |   | [1, 3]    |

|                |                                                                                                                                  |                                                                                      |        |
|----------------|----------------------------------------------------------------------------------------------------------------------------------|--------------------------------------------------------------------------------------|--------|
| Linolenic acid | <i>M. acuminata</i> X <i>M. balbisiana</i> (ABB group)                                                                           | 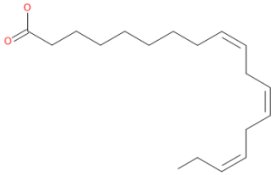    | [1]    |
| Oleic acid     | <i>M. acuminata</i> X <i>M. balbisiana</i> (ABB group)                                                                           |    | [1]    |
| Palmitic acid  | <i>M. acuminata</i> X <i>M. balbisiana</i> (ABB group), <i>Musa liukuensis</i> , <i>M. acuminata</i> , and <i>M. chiliocarpa</i> |    | [1, 3] |
| Rutin          | <i>M. balbisiana</i> and <i>M. paradisiaca</i>                                                                                   |   | [2, 4] |
| Stearic acid   | <i>M. acuminata</i> X <i>M. balbisiana</i> (ABB group), <i>Musa liukuensis</i> , <i>M. acuminata</i> , and <i>M. chiliocarpa</i> |  | [1, 3] |

**Supplementary Table S2.** Extraction yields of banana byproducts.

| Banana byproducts | Extraction method / Solvent | Yield (%) |
|-------------------|-----------------------------|-----------|
| Midrib            | Soxhlet / Hexane            | 4.22      |
|                   | Soxhlet / Ethyl Acetate     | 1.30      |
|                   | Soxhlet / Ethanol           | 19.31     |
|                   | Maceration / Water          | 18.18     |
| Leaf              | Soxhlet / Hexane            | 9.00      |
|                   | Soxhlet / Ethyl Acetate     | 7.46      |
|                   | Soxhlet / Ethanol           | 17.90     |
|                   | Maceration / Water          | 10.44     |
| Peduncle          | Soxhlet / Hexane            | 1.37      |
|                   | Soxhlet / Ethyl Acetate     | 2.75      |
|                   | Soxhlet / Ethanol           | 15.29     |
|                   | Maceration / Water          | 24.34     |
| Unripe peel       | Soxhlet / Hexane            | 11.32     |
|                   | Soxhlet / Ethyl Acetate     | 1.27      |
|                   | Soxhlet / Ethanol           | 11.13     |
|                   | Maceration / Water          | 13.47     |
| Ripe peel         | Soxhlet / Hexane            | 12.61     |
|                   | Soxhlet / Ethyl Acetate     | 1.38      |
|                   | Soxhlet / Ethanol           | 22.35     |
|                   | Maceration / Water          | 23.46     |

**Supplementary Table S3.** Molecular docking results between compounds from Musa spp. leaves and the binding site of inducible nitric oxide synthases (iNOS) (PDB ID: 3E6T).

| No. | Compound                                                                                                                               | Binding energy<br>(kcal/mol) | Inhibition<br>Constant | Amino acid interaction                                                                           |                                                                              |                       |
|-----|----------------------------------------------------------------------------------------------------------------------------------------|------------------------------|------------------------|--------------------------------------------------------------------------------------------------|------------------------------------------------------------------------------|-----------------------|
|     |                                                                                                                                        |                              |                        | Hydrogen<br>bond                                                                                 | Hydrophobic<br>bond                                                          | Electrostatic<br>bond |
|     | 5-(4'-Amino-1'-ethyl-5',8'-difluoro-1'H-spiro [piperidine-4,2'-quinazoline]-1-ylcarbonyl) picolinonitrile (Original ligand re-docking) | -7.39                        | 3.85 $\mu$ M           | TYR341<br>GLY365<br>TRP366<br>GLU371<br>GLU371<br>ASP376                                         | PRO344<br>PRO344<br>TYR367                                                   | ARG260                |
|     | Gallic acid (Positive control)                                                                                                         | -3.96                        | 1.25 mM                | SER256<br>ARG260<br>ASN348<br>ASN348                                                             | SER256                                                                       |                       |
| 1   | Kaempferol-3-O-rutinoside                                                                                                              | -9.77                        | 69.38 nM               | ASN115<br>ASN115<br>TYR341<br>ASN348<br>TYR367                                                   | MET114<br>PRO344<br>VAL346<br>VAL346<br>PHE363<br>TRP457<br>TYR485           | CYS194                |
| 2   | Rutin                                                                                                                                  | -9.22                        | 174.97 nM              | GLN257<br>GLN257<br>TYR341<br>TYR341<br>PRO344<br>PRO344<br>VAL346<br>GLY365<br>TRP366<br>ASP376 | GLU371<br>GLU371                                                             | VAL346<br>TRP457      |
| 3   | Linoleic acid                                                                                                                          | -4.97                        | 228.11 $\mu$ M         | TYR341<br>ALA345                                                                                 | TRP188<br>TRP188<br>ALA191<br>CYS194<br>CYS194<br>PRO344<br>PRO344<br>VAL346 |                       |

|   |                       |       |                |        |        |
|---|-----------------------|-------|----------------|--------|--------|
|   |                       |       |                |        | PHE363 |
|   |                       |       |                |        | PHE363 |
| 4 | Eicosapentaenoic acid | -4.93 | 242.01 $\mu$ M | TYR341 | TRP188 |
|   |                       |       |                | LEU343 | ALA191 |
|   |                       |       |                | PRO344 | CYS194 |
|   |                       |       |                | ALA345 | CYS194 |
|   |                       |       |                |        | CYS194 |
|   |                       |       |                |        | PRO344 |
|   |                       |       |                |        | PRO344 |
|   |                       |       |                |        | VAL346 |
|   |                       |       |                |        | PHE363 |
|   |                       |       |                |        | PHE363 |
| 5 | Oleic acid            | -4.44 | 553.02 $\mu$ M | ILE259 | ALA191 |
|   |                       |       |                | TYR341 | ARG193 |
|   |                       |       |                | ALA345 | CYS194 |
|   |                       |       |                |        | PRO344 |
|   |                       |       |                |        | PRO344 |
|   |                       |       |                |        | VAL346 |
|   |                       |       |                |        | VAL346 |
| 6 | Linolenic acid        | -4.36 | 632.09 $\mu$ M | TYR341 | CYS194 |
|   |                       |       |                | ALA345 | CYS194 |
|   |                       |       |                |        | PRO344 |
|   |                       |       |                |        | PRO344 |
|   |                       |       |                |        | PRO344 |
|   |                       |       |                |        | VAL346 |
| 7 | Stearic acid          | -4.33 | 670.63 $\mu$ M | TYR341 | TRP188 |
|   |                       |       |                | ALA345 | ARG193 |
|   |                       |       |                |        | CYS194 |
|   |                       |       |                |        | PRO344 |
|   |                       |       |                |        | PRO344 |
|   |                       |       |                |        | VAL346 |
|   |                       |       |                |        | PHE363 |
|   |                       |       |                |        | PHE363 |
| 8 | Palmitic acid         | -4.27 | 737.18 $\mu$ M | TYR341 | ALA191 |
|   |                       |       |                | ALA345 | CYS194 |
|   |                       |       |                | LEU343 | PRO344 |
|   |                       |       |                |        | PRO344 |
|   |                       |       |                |        | VAL346 |
|   |                       |       |                |        | VAL346 |
|   |                       |       |                |        | PHE363 |
|   |                       |       |                |        | PHE363 |

|    |                 |       |         |        |        |
|----|-----------------|-------|---------|--------|--------|
|    |                 |       |         |        | TYR367 |
| 9  | Behenic acid    | -3.92 | 1.33 mM |        | CYS194 |
|    |                 |       |         |        | CYS194 |
|    |                 |       |         |        | PRO344 |
|    |                 |       |         |        | PRO344 |
|    |                 |       |         |        | PRO344 |
|    |                 |       |         |        | VAL346 |
|    |                 |       |         |        | VAL346 |
|    |                 |       |         |        | VAL346 |
|    |                 |       |         |        | PHE363 |
|    |                 |       |         |        | PHE363 |
|    |                 |       |         |        | TYR367 |
| 10 | Lignoceric acid | -3.09 | 5.44 mM | TYR341 | ALA191 |
|    |                 |       |         |        | ARG193 |
|    |                 |       |         |        | CYS194 |
|    |                 |       |         |        | CYS194 |
|    |                 |       |         |        | PRO344 |
|    |                 |       |         |        | PRO344 |
|    |                 |       |         |        | PRO344 |
|    |                 |       |         |        | VAL346 |
|    |                 |       |         |        | TYR367 |
|    |                 |       |         |        | TRP457 |

**Supplementary Table S4.** Molecular docking results between compounds from *Musa* spp. leaves and the binding site of 15-lipoxygenase (15-LOX) (PDB ID: 1LOX).

| No. | Compound                                                                                | Binding energy<br>(kcal/mol) | Inhibition<br>Constant | Amino acid interaction |                                                                                                                                                              |                            |
|-----|-----------------------------------------------------------------------------------------|------------------------------|------------------------|------------------------|--------------------------------------------------------------------------------------------------------------------------------------------------------------|----------------------------|
|     |                                                                                         |                              |                        | Hydrogen<br>bond       | Hydrophobic<br>bond                                                                                                                                          | Electrostatic<br>bond      |
|     | (2 <i>e</i> )-3-(2-Oct-1-Yn-1-<br>Ylphenyl)acrylic Acid<br>(Original ligand re-docking) | -6.36                        | 21.64 $\mu$ M          |                        | HIS361<br>LEU362<br>HIS366<br>HIS366<br>LEU408<br>ALA404<br>ILE593<br>LEU597                                                                                 | GLU357                     |
|     | Sodium Diclofenac<br>(Positive control)                                                 | -6.87                        | 9.17 $\mu$ M           | GLU357<br>GLU357       | HIS361<br>LEU362<br>HIS366<br>ALA404<br>LEU408<br>LEU408<br>PHE415<br>HIS545<br>ILE593<br>LEU597<br>LEU597                                                   | GLU357<br>HIS361<br>HIS366 |
|     | Indomethacin<br>(Positive control)                                                      | -7.73                        | 2.14 $\mu$ M           |                        | PHE353<br>LEU362<br>LEU362<br>HIS366<br>ILE400<br>ALA404<br>LEU408<br>LEU408<br>ILE418<br>MET419<br>MET419<br>CYS560<br>ILE593<br>ILE593<br>ILE593<br>VAL594 | GLU357<br>HIS361           |

|   |                       |       |               |        |        |        |  |
|---|-----------------------|-------|---------------|--------|--------|--------|--|
|   |                       |       |               |        | LEU597 |        |  |
|   |                       |       |               |        | LEU597 |        |  |
| 1 | Eicosapentaenoic acid | -6.62 | 25.63 $\mu$ M |        | HIS361 |        |  |
|   |                       |       |               |        | PHE353 |        |  |
|   |                       |       |               |        | LEU362 |        |  |
|   |                       |       |               |        | LEU362 |        |  |
|   |                       |       |               |        | HIS366 |        |  |
|   |                       |       |               |        | HIS366 |        |  |
|   |                       |       |               |        | ALA404 |        |  |
|   |                       |       |               |        | LEU408 |        |  |
|   |                       |       |               |        | LEU408 |        |  |
|   |                       |       |               |        | LEU408 |        |  |
|   |                       |       |               |        | LEU408 |        |  |
|   |                       |       |               |        | VAL409 |        |  |
|   |                       |       |               |        | PHE415 |        |  |
|   |                       |       |               |        | PHE415 |        |  |
|   |                       |       |               |        | MET419 |        |  |
|   |                       |       |               |        | MET419 |        |  |
|   |                       |       |               |        | ILE593 |        |  |
|   |                       |       |               |        | ILE593 |        |  |
|   |                       |       |               |        | VAL594 |        |  |
|   |                       |       |               |        | LEU597 |        |  |
| 2 | Linoleic acid         | -5.94 | 43.94 $\mu$ M | HIS366 | PHE353 |        |  |
|   |                       |       |               | HIS366 | HIS361 |        |  |
|   |                       |       |               | ASN401 | HIS361 |        |  |
|   |                       |       |               |        | LEU362 |        |  |
|   |                       |       |               |        | HIS366 |        |  |
|   |                       |       |               |        | LEU408 |        |  |
|   |                       |       |               |        | LEU408 |        |  |
|   |                       |       |               |        | LEU408 |        |  |
|   |                       |       |               |        | PHE415 |        |  |
|   |                       |       |               |        | MET419 |        |  |
|   |                       |       |               |        | ILE593 |        |  |
|   |                       |       |               |        | ILE593 |        |  |
|   |                       |       |               |        | ILE593 |        |  |
|   |                       |       |               |        | VAL594 |        |  |
|   |                       |       |               |        | LEU597 |        |  |
|   |                       |       |               |        | LEU597 |        |  |
| 3 | Rutin                 | -5.91 | 46.71 $\mu$ M | HIS361 | ALA404 | GLU357 |  |
|   |                       |       |               | HIS366 | LEU408 | GLU357 |  |
|   |                       |       |               | ARG403 | LEU408 |        |  |



|   |                |       |                |        |        |
|---|----------------|-------|----------------|--------|--------|
|   |                |       |                | ALA404 | VAL409 |
|   |                |       |                | LEU408 | ILE593 |
|   |                |       |                | HIS545 | VAL594 |
|   |                |       |                | HIS545 | LEU597 |
|   |                |       |                | VAL594 | LEU597 |
|   |                |       |                | LEU597 | LEU597 |
|   |                |       |                | LEU597 | LEU362 |
|   |                |       |                | ILE663 |        |
| 4 | Linolenic acid | -5.48 | 95.93 $\mu$ M  | ALA404 | HIS361 |
|   |                |       |                | LEU408 | HIS361 |
|   |                |       |                |        | LEU362 |
|   |                |       |                |        | LEU362 |
|   |                |       |                |        | HIS366 |
|   |                |       |                |        | HIS366 |
|   |                |       |                |        | ILE400 |
|   |                |       |                |        | ALA404 |
|   |                |       |                |        | ALA404 |
|   |                |       |                |        | LEU408 |
|   |                |       |                |        | PHE415 |
|   |                |       |                |        | LEU597 |
|   |                |       |                |        | LEU597 |
| 5 | Oleic acid     | -5.17 | 161.95 $\mu$ M |        | PHE353 |
|   |                |       |                |        | HIS361 |
|   |                |       |                |        | HIS361 |
|   |                |       |                |        | HIS361 |
|   |                |       |                |        | LEU362 |
|   |                |       |                |        | LEU362 |
|   |                |       |                |        | HIS366 |
|   |                |       |                |        | HIS366 |
|   |                |       |                |        | ALA404 |
|   |                |       |                |        | LEU408 |
|   |                |       |                |        | LEU408 |
|   |                |       |                |        | LEU408 |
|   |                |       |                |        | MET419 |
|   |                |       |                |        | ILE593 |
|   |                |       |                |        | ILE593 |
|   |                |       |                |        | VAL594 |
|   |                |       |                |        | LEU597 |

|   |               |       |                |        |
|---|---------------|-------|----------------|--------|
| 6 | Stearic acid  | -4.71 | 353.03 $\mu$ M | HIS361 |
|   |               |       |                | LEU362 |
|   |               |       |                | LEU362 |
|   |               |       |                | HIS366 |
|   |               |       |                | HIS366 |
|   |               |       |                | ILE400 |
|   |               |       |                | ARG403 |
|   |               |       |                | ALA404 |
|   |               |       |                | ALA404 |
|   |               |       |                | ALA404 |
|   |               |       |                | VAL409 |
|   |               |       |                | LEU408 |
|   |               |       |                | PHE415 |
|   |               |       |                | LEU597 |
| 7 | Palmitic acid | -4.57 | 443.12 $\mu$ M | HIS361 |
|   |               |       |                | HIS361 |
|   |               |       |                | LEU362 |
|   |               |       |                | LEU362 |
|   |               |       |                | HIS366 |
|   |               |       |                | HIS366 |
|   |               |       |                | ILE400 |
|   |               |       |                | ALA404 |
|   |               |       |                | LEU408 |
|   |               |       |                | LEU408 |
|   |               |       |                | LEU408 |
|   |               |       |                | PHE415 |
|   |               |       |                | ILE593 |
|   |               |       |                | LEU597 |
| 8 | Behenic acid  | -4.42 | 579.68 $\mu$ M | PHE353 |
|   |               |       |                | HIS361 |
|   |               |       |                | HIS361 |
|   |               |       |                | LEU362 |
|   |               |       |                | LEU362 |
|   |               |       |                | HIS366 |
|   |               |       |                | HIS366 |
|   |               |       |                | ILE400 |
|   |               |       |                | ALA404 |
|   |               |       |                | ALA404 |

|    |                           |       |                |        |        |        |
|----|---------------------------|-------|----------------|--------|--------|--------|
|    |                           |       |                |        | LEU408 |        |
|    |                           |       |                |        | LEU408 |        |
|    |                           |       |                |        | LEU408 |        |
|    |                           |       |                |        | ILE418 |        |
|    |                           |       |                |        | MET419 |        |
|    |                           |       |                |        | ILE593 |        |
|    |                           |       |                |        | ILE593 |        |
|    |                           |       |                |        | ILE593 |        |
|    |                           |       |                |        | LEU597 |        |
|    |                           |       |                |        | LEU597 |        |
|    |                           |       |                |        | LEU597 |        |
| 9  | Lignoceric acid           | -4.29 | 711.91 $\mu$ M |        | PHE353 |        |
|    |                           |       |                |        | HIS361 |        |
|    |                           |       |                |        | HIS361 |        |
|    |                           |       |                |        | LEU362 |        |
|    |                           |       |                |        | LEU362 |        |
|    |                           |       |                |        | HIS366 |        |
|    |                           |       |                |        | HIS366 |        |
|    |                           |       |                |        | ILE400 |        |
|    |                           |       |                |        | ILE400 |        |
|    |                           |       |                |        | ARG403 |        |
|    |                           |       |                |        | ALA404 |        |
|    |                           |       |                |        | ALA404 |        |
|    |                           |       |                |        | LEU408 |        |
|    |                           |       |                |        | LEU408 |        |
|    |                           |       |                |        | LEU408 |        |
|    |                           |       |                |        | LEU408 |        |
|    |                           |       |                |        | PHE415 |        |
|    |                           |       |                |        | ILE418 |        |
|    |                           |       |                |        | MET419 |        |
|    |                           |       |                |        | ILE593 |        |
|    |                           |       |                |        | ILE593 |        |
|    |                           |       |                |        | ILE593 |        |
|    |                           |       |                |        | VAL594 |        |
|    |                           |       |                |        | LEU597 |        |
|    |                           |       |                |        | LEU597 |        |
| 10 | Kaempferol-3-O-rutinoside | -3.57 | 2.42 mM        | HIS361 | GLU357 | GLU357 |
|    |                           |       |                | HIS366 | LEU358 | GLU357 |
|    |                           |       |                | ILE400 | LEU358 |        |
|    |                           |       |                | ASN401 | LEU362 |        |

---

|        |        |
|--------|--------|
| HIS545 | ALA404 |
| GLN548 | LEU408 |
| LEU597 | LEU408 |
|        | LEU408 |
|        | VAL409 |
|        | ILE593 |
|        | VAL594 |
|        | LEU597 |
|        | LEU597 |

---

**Supplementary Table S5.** Molecular docking results between compounds from *Musa* spp. leaves and the binding site of cyclooxygenase-2 (COX-2) (PDB ID: 5KIR).

| No. | Compound                                  | Binding energy<br>(kcal/mol) | Inhibition<br>Constant | Amino acid interaction |                     |                       |
|-----|-------------------------------------------|------------------------------|------------------------|------------------------|---------------------|-----------------------|
|     |                                           |                              |                        | Hydrogen<br>bond       | Hydrophobic<br>bond | Electrostatic<br>bond |
|     | Rofecoxib<br>(Original ligand re-docking) | -10.65                       | 15.62 nM               | ARG513                 | LEU352              |                       |
|     |                                           |                              |                        | ILE517                 | LEU352              |                       |
|     |                                           |                              |                        | PHE518                 | VAL349              |                       |
|     |                                           |                              |                        | ALA527                 | PHE518              |                       |
|     |                                           |                              |                        |                        | VAL523              |                       |
|     |                                           |                              |                        |                        | VAL523              |                       |
|     |                                           |                              |                        |                        | VAL523              |                       |
|     |                                           |                              |                        |                        | GLY526              |                       |
|     |                                           |                              |                        |                        | ALA527              |                       |
|     |                                           |                              |                        |                        | ALA527              |                       |
|     | Sodium Diclofenac<br>(Positive control)   | -7.42                        | 3.65 $\mu$ M           | TYR385                 | VAL349              |                       |
|     |                                           |                              |                        | SER530                 | VAL349              |                       |
|     |                                           |                              |                        |                        | LEU352              |                       |
|     |                                           |                              |                        |                        | PHE518              |                       |
|     |                                           |                              |                        |                        | VAL523              |                       |
|     |                                           |                              |                        |                        | ALA527              |                       |
|     |                                           |                              |                        |                        | ALA527              |                       |
|     | Indomethacin<br>(Positive control)        | -8.68                        | 433.96 nM              | ARG120                 | HIS90               |                       |
|     |                                           |                              |                        | ARG120                 | TYR348              |                       |
|     |                                           |                              |                        | ARG513                 | VAL349              |                       |
|     |                                           |                              |                        |                        | VAL349              |                       |
|     |                                           |                              |                        |                        | VAL349              |                       |
|     |                                           |                              |                        |                        | LEU352              |                       |
|     |                                           |                              |                        |                        | LEU352              |                       |
|     |                                           |                              |                        |                        | LEU352              |                       |
|     |                                           |                              |                        |                        | TYR385              |                       |
|     |                                           |                              |                        |                        | ALA516              |                       |
|     |                                           |                              |                        |                        | VAL523              |                       |
|     |                                           |                              |                        |                        | VAL523              |                       |
|     |                                           |                              |                        |                        | VAL523              |                       |
|     |                                           |                              |                        |                        | VAL523              |                       |
|     | Eicosapentaenoic acid                     | -7.26                        | 4.76 $\mu$ M           |                        | ALA527              |                       |
|     |                                           |                              |                        |                        | ALA527              |                       |
| 1   | Eicosapentaenoic acid                     | -7.26                        | 4.76 $\mu$ M           | HIS90                  | VAL349              |                       |

|   |              |       |          |        |        |
|---|--------------|-------|----------|--------|--------|
|   |              |       |          | ARG513 | LEU352 |
|   |              |       |          | ARG513 | LEU352 |
|   |              |       |          | PHE518 | LEU352 |
|   |              |       |          |        | LEU384 |
|   |              |       |          |        | TYR385 |
|   |              |       |          |        | TRP387 |
|   |              |       |          |        | TRP387 |
|   |              |       |          |        | PHE518 |
|   |              |       |          |        | PHE518 |
|   |              |       |          |        | PHE518 |
|   |              |       |          |        | MET522 |
|   |              |       |          |        | VAL523 |
|   |              |       |          |        | VAL523 |
|   |              |       |          |        | VAL523 |
|   |              |       |          |        | ALA527 |
|   |              |       |          |        | ALA527 |
| 2 | Oleic acid   | -6.87 | 9.28 μM  | ARG120 | PHE205 |
|   |              |       |          | ARG120 | VAL344 |
|   |              |       |          |        | TYR348 |
|   |              |       |          |        | VAL349 |
|   |              |       |          |        | VAL349 |
|   |              |       |          |        | VAL349 |
|   |              |       |          |        | LEU352 |
|   |              |       |          |        | LEU352 |
|   |              |       |          |        | TYR355 |
|   |              |       |          |        | TYR385 |
|   |              |       |          |        | TRP387 |
|   |              |       |          |        | PHE518 |
|   |              |       |          |        | VAL523 |
|   |              |       |          |        | VAL523 |
|   |              |       |          |        | ALA527 |
|   |              |       |          |        | ALA527 |
|   |              |       |          |        | ALA527 |
|   |              |       |          |        | LEU534 |
| 3 | Stearic acid | -6.69 | 12.44 μM | ARG120 | VAL349 |
|   |              |       |          | TYR355 | VAL349 |
|   |              |       |          |        | LEU352 |
|   |              |       |          |        | LEU352 |
|   |              |       |          |        | TYR355 |
|   |              |       |          |        | PHE518 |
|   |              |       |          |        | VAL523 |

|   |                |       |               |        |        |
|---|----------------|-------|---------------|--------|--------|
|   |                |       |               |        | VAL523 |
|   |                |       |               |        | VAL523 |
|   |                |       |               |        | ALA527 |
|   |                |       |               |        | ALA527 |
|   |                |       |               |        | LEU531 |
| 4 | Linolenic acid | -6.67 | 12.89 $\mu$ M | ARG120 | VAL349 |
|   |                |       |               | ARG120 | VAL349 |
|   |                |       |               |        | VAL349 |
|   |                |       |               |        | LEU352 |
|   |                |       |               |        | LEU352 |
|   |                |       |               |        | TYR355 |
|   |                |       |               |        | TRP387 |
|   |                |       |               |        | PHE518 |
|   |                |       |               |        | MET522 |
|   |                |       |               |        | VAL523 |
|   |                |       |               |        | ALA527 |
|   |                |       |               |        | ALA527 |
|   |                |       |               |        | ALA527 |
| 5 | Palmitic acid  | -6.53 | 16.38 $\mu$ M | HIS90  | VAL344 |
|   |                |       |               | TYR355 | TYR348 |
|   |                |       |               | ARG513 | VAL349 |
|   |                |       |               | ARG513 | LEU352 |
|   |                |       |               |        | LEU352 |
|   |                |       |               |        | TRP387 |
|   |                |       |               |        | PHE518 |
|   |                |       |               |        | PHE518 |
|   |                |       |               |        | VAL523 |
|   |                |       |               |        | VAL523 |
|   |                |       |               |        | ALA527 |
| 6 | Linoleic acid  | -6.40 | 20.19 $\mu$ M | ARG120 | VAL349 |
|   |                |       |               | ARG120 | LEU352 |
|   |                |       |               |        | LEU352 |
|   |                |       |               |        | LEU352 |
|   |                |       |               |        | TYR355 |
|   |                |       |               |        | LEU384 |
|   |                |       |               |        | TYR385 |
|   |                |       |               |        | TRP387 |
|   |                |       |               |        | TRP387 |
|   |                |       |               |        | PHE518 |
|   |                |       |               |        | MET522 |
|   |                |       |               |        | VAL523 |

|   |                           |       |               |        |        |
|---|---------------------------|-------|---------------|--------|--------|
|   |                           |       |               |        | VAL523 |
|   |                           |       |               |        | ALA527 |
| 7 | Behenic acid              | -5.79 | 56.72 $\mu$ M | HIS90  | VAL116 |
|   |                           |       |               | HIS90  | ARG120 |
|   |                           |       |               | HIS90  | VAL349 |
|   |                           |       |               | ARG513 | VAL349 |
|   |                           |       |               | ARG513 | LEU352 |
|   |                           |       |               |        | LEU352 |
|   |                           |       |               |        | LEU352 |
|   |                           |       |               |        | TYR355 |
|   |                           |       |               |        | PHE518 |
|   |                           |       |               |        | PHE518 |
|   |                           |       |               |        | VAL523 |
|   |                           |       |               |        | ALA527 |
|   |                           |       |               |        | LEU531 |
| 8 | Kaempferol-3-O-rutinoside | -5.55 | 85.77 $\mu$ M | HIS90  | VAL116 |
|   |                           |       |               | LEU352 | VAL349 |
|   |                           |       |               | SER353 | VAL349 |
|   |                           |       |               | TYR385 | VAL349 |
|   |                           |       |               | PHE518 | TYR355 |
|   |                           |       |               | MET522 | LEU359 |
|   |                           |       |               | GLY526 | TYR385 |
|   |                           |       |               |        | TRP387 |
|   |                           |       |               |        | LEU531 |
|   |                           |       |               |        | ALA527 |
|   |                           |       |               |        | ALA527 |
|   |                           |       |               |        | ALA527 |
|   |                           |       |               |        | LEU531 |
| 9 | Rutin                     | -4.71 | 351.45 nM     | HIS90  | VAL349 |
|   |                           |       |               | ARG120 | LEU352 |
|   |                           |       |               | ARG120 | LEU352 |
|   |                           |       |               | GLN192 | ALA516 |
|   |                           |       |               | LEU352 | ILE517 |
|   |                           |       |               | TYR355 | PHE518 |
|   |                           |       |               | TYR355 | VAL523 |



|    |                 |       |         |        |        |
|----|-----------------|-------|---------|--------|--------|
|    |                 |       |         | ARG513 | VAL523 |
|    |                 |       |         | ARG513 | ALA527 |
|    |                 |       |         | ARG513 | LEU531 |
|    |                 |       |         | ILE517 |        |
|    |                 |       |         | PHE518 |        |
|    |                 |       |         | SER530 |        |
| 10 | Lignoceric acid | -3.81 | 1.60 mM |        | HIS90  |
|    |                 |       |         |        | TYR348 |
|    |                 |       |         |        | VAL349 |
|    |                 |       |         |        | VAL349 |
|    |                 |       |         |        | VAL349 |
|    |                 |       |         |        | LEU352 |
|    |                 |       |         |        | LEU352 |
|    |                 |       |         |        | TYR385 |
|    |                 |       |         |        | TRP387 |
|    |                 |       |         |        | PHE518 |
|    |                 |       |         |        | VAL523 |
|    |                 |       |         |        | ALA527 |
|    |                 |       |         |        | ALA527 |
|    |                 |       |         |        | ALA527 |

**Supplementary Table S6.** Toxicity of banana byproducts in brine shrimp lethality test.

| Banana byproducts | Solvent       | Percentage of death at 24 hours |             |             |             |              | LC <sub>50</sub> (µg/mL) |
|-------------------|---------------|---------------------------------|-------------|-------------|-------------|--------------|--------------------------|
|                   |               | 10 (µg/mL)                      | 100 (µg/mL) | 250 (µg/mL) | 500 (µg/mL) | 1000 (µg/mL) |                          |
| Midrib            | Hexane        | 0                               | 0           | 0           | 0           | 12           | > 1000                   |
|                   | Ethyl Acetate | 0                               | 0           | 0           | 0           | 10           | > 1000                   |
|                   | Ethanol       | 0                               | 0           | 2           | 4           | 6            | > 1000                   |
|                   | Water         | 0                               | 0           | 0           | 0           | 4            | > 1000                   |
| Leaf              | Hexane        | 0                               | 0           | 2           | 10          | 86           | 802.39                   |
|                   | Ethyl Acetate | 0                               | 0           | 0           | 0           | 2            | > 1000                   |
|                   | Ethanol       | 0                               | 0           | 0           | 2           | 18           | > 1000                   |
|                   | Water         | 0                               | 0           | 0           | 6           | 26           | > 1000                   |
| Peduncle          | Hexane        | 0                               | 0           | 8           | 24          | 84           | 737.89                   |
|                   | Ethyl Acetate | 0                               | 0           | 0           | 0           | 6            | > 1000                   |
|                   | Ethanol       | 0                               | 0           | 0           | 6           | 16           | > 1000                   |
|                   | Water         | 0                               | 0           | 12          | 14          | 34           | > 1000                   |
| Unripe peel       | Hexane        | 0                               | 0           | 0           | 6           | 38           | > 1000                   |
|                   | Ethyl Acetate | 0                               | 0           | 0           | 0           | 0            | > 1000                   |
|                   | Ethanol       | 0                               | 0           | 0           | 2           | 6            | > 1000                   |
|                   | Water         | 0                               | 0           | 4           | 14          | 36           | > 1000                   |
| Ripe peel         | Hexane        | 0                               | 0           | 0           | 0           | 18           | > 1000                   |
|                   | Ethyl Acetate | 0                               | 0           | 0           | 0           | 2            | > 1000                   |
|                   | Ethanol       | 0                               | 0           | 0           | 0           | 0            | > 1000                   |
|                   | Water         | 0                               | 0           | 6           | 56          | 94           | 469.39                   |

## References

1. Charumanee S, Yotsawimonwat S, Sirisa-Ard P, Pholsongkram K. Characterization and chemical composition of epicuticular wax from banana leaves grown in Northern Thailand. *Songklanakarin Journal of Science & Technology*. 2017;39(4).
2. Yingyuen P, Sukrong S, Phisalaphong M. Isolation, separation and purification of rutin from Banana leaves (*Musa balbisiana*). *Industrial Crops and Products*. 2020;149:112307.
3. Asemave K, Ujah SA. Determination of the Chemical Composition of Banana Leaves Wax. *International Journal of Applied Sciences: Current and Future Research Trends*. 2021;11(1):23-30.
4. Kappel VD, Cazarolli LH, Pereira DF, Postal BG, Madoglio FA, Buss ZdS, et al. Beneficial effects of banana leaves (*Musa x paradisiaca*) on glucose homeostasis: Multiple sites of action. *Revista Brasileira de Farmacognosia*. 2013;23(4):706-15.
